# Supplementary material
Source: PubMed Central journal article supplement (PMC7269393)
Supplement: JCM.00004-20-s0001.pdf [file JCM.00004-20-s0001.pdf]

**Supplementary Table 1.** Overview of identification scores (ID) after 72 hours of incubation with MALDI-TOF MS after enrichment method for *Mycoplasma bovis* (*Mb*), Ct scores (Ct) of triplex real-time PCR for *Mb*, *M. bovirhinis* (*Mbr*), *M. dispar* (*Md*), selective-indicative agar of *M. bovis* (SIA) obtained from 104 BALF originating from cattle in Flanders, Belgium (2019). Also results of blood agar plates are shown (after 24 hours of incubation).

| No. | Farm | ID<br><i>Mb</i> | Ct<br><i>Mb</i> | Ct<br><i>Mbr</i> | Ct<br><i>Md</i> | SIA<br><i>Mb</i> | Blood agar (24 hours)<br>Identification with MALDI-TOF                                                                                      |
|-----|------|-----------------|-----------------|------------------|-----------------|------------------|---------------------------------------------------------------------------------------------------------------------------------------------|
| 1   | A    | -*              | -               | 25,30            | 23,47           | -                | <i>Mannheimia haemolytica</i> , <i>Moraxella branhamella ovis</i>                                                                           |
| 2   | A    | -*              | -               | 27,19            | 23,15           | -                | <i>M. haemolytica</i> , <i>Staphylococcus cohnii</i> , <i>Bacillus species</i> ,<br><i>Corynebacterium spp.</i> , <i>Streptococcus suis</i> |
| 3   | A    | 2,08*           | 21,66           | 24,98            | 23,00           | +                | <i>M. haemolytica</i> , <i>Aeromonas veronii</i> , <i>Bacillus spp.</i> , <i>Staphylococcus sciuri</i> , <i>Bibersteinia trehalosi</i>      |
| 4   | A    | -*              | 36,46           | 31,56            | 26,66           | -                | <i>M. haemolytica</i> , <i>S. sciuri</i> , <i>Staphylococcus lentus</i> , <i>Neisseria perflava</i>                                         |
| 5   | A    | -               | -               | 27,74            | 23,16           | -                | <i>Histophilus somni</i>                                                                                                                    |
| 6   | A    | -               | -               | 29,45            | 23,57           | -                | <i>B. trehalosi</i> , <i>Streptococcus hyovaginalis</i>                                                                                     |
| 7   | A    | -               | -               | 25,26            | 23,06           | -                | <i>M. haemolytica</i> , <i>B. trehalosi</i> , <i>H. somni</i> , <i>Escherichia coli</i>                                                     |
| 8   | A    | -               | -               | 26,87            | 22,59           | -                | <i>M. haemolytica</i> , <i>H. somni</i> , <i>M. ovis</i>                                                                                    |
| 9   | A    | -               | -               | 26,39            | 21,73           | -                | <i>M. haemolytica</i> , <i>B. trehalosi</i> , <i>Bacillus subtilis</i>                                                                      |
| 10  | A    | -               | -               | 33,90            | 26,58           | -                | <i>M. haemolytica</i>                                                                                                                       |
| 11  | A    | -               | -               | 30,20            | 23,96           | -                | <i>B. trehalosi</i>                                                                                                                         |
| 12  | A    | -               | -               | 28,08            | 21,48           | -                | <i>H. somni</i>                                                                                                                             |
| 13  | A    | -               | -               | 33,17            | 32,11           | -                | <i>H. somni</i>                                                                                                                             |
| 14  | A    | -               | -               | 30,01            | 24,17           | -                | <i>M. haemolytica</i> , <i>B. trehalosi</i> , <i>H. somni</i>                                                                               |
| 15  | A    | -               | -               | 27,38            | 26,21           | -                | <i>H. somni</i> , <i>Staphylococcus equorum</i>                                                                                             |
| 16  | A    | -               | -               | 22,99            | 22,53           | +                | <i>M. haemolytica</i> , <i>H. somni</i> , <i>M. ovis</i>                                                                                    |
| 17  | A    | 1,74            | -               | 26,93            | 24,23           | +                | <i>M. haemolytica</i> , <i>Pasteurella multocida</i>                                                                                        |
| 18  | A    | 2,08            | 37,00           | 30,18            | 25,80           | -                | <i>M. haemolytica</i> , <i>B. trehalosi</i> , <i>Streptococcus hyovaginalis</i> , <i>N. subflava</i> , <i>Staphylococcus xylosus</i>        |
| 19  | A    | 1,81            | 24,26           | 29,56            | 21,40           | +                | <i>Gallibacterium anatis</i> , <i>Bacillus pumilus</i> , <i>Lactobacillus salivarius</i> ,<br><i>Pelistega europaea</i>                     |
| 20  | A    | 1,75            | 29,09           | 28,55            | 23,28           | +                | <i>M. haemolytica</i> , <i>Staphylococcus aureus</i>                                                                                        |
| 21  | A    | -               | -               | 30,46            | 23,74           | -                | <i>M. haemolytica</i> , <i>H. somni</i> , <i>S. equorum</i>                                                                                 |
| 22  | B    | -               | -               | 36,08            | 40,29           | -                | -                                                                                                                                           |
| 23  | C    | -               | -               | 30,39            | 28,06           | -                | -                                                                                                                                           |
| 24  | C    | -               | -               | 27,09            | 23,72           | -                | -                                                                                                                                           |
| 25  | C    | -               | -               | -                | 23,26           | -                | <i>S. suis</i> , <i>B. subtilis</i>                                                                                                         |
| 26  | D    | -               | -               | 33,12            | 24,53           | -                | <i>Acinetobacter towneri</i> , <i>Serratia liquefaciens</i> , <i>Aerococcus viridans</i>                                                    |
| 27  | D    | -               | -               | 26,43            | 20,73           | -                | <i>P. multocida</i> , <i>M. ovis</i>                                                                                                        |
| 28  | D    | -               | -               | 29,08            | 29,22           | -                | <i>E. coli</i> , <i>N. subflava</i> , <i>S. suis</i>                                                                                        |
| 29  | D    | -               | -               | 26,41            | 27,27           | -                | <i>M. ovis</i> , <i>S. sciuri</i>                                                                                                           |
| 30  | D    | -               | -               | 26,66            | 25,10           | -                | <i>S. xylosus</i> , <i>Neisseria flavescens</i> , <i>S. suis</i>                                                                            |
| 31  | D    | -               | -               | 26,61            | 26,41           | -                | <i>P. multocida</i>                                                                                                                         |
| 32  | D    | -               | -               | -                | -               | -                | -                                                                                                                                           |
| 33  | D    | -               | -               | 29,37            | 26,83           | -                | <i>M. haemolytica</i> , <i>P. multocida</i> , <i>M. ovis</i> , <i>S. suis</i>                                                               |
| 34  | D    | -               | -               | 29,79            | 25,43           | -                | <i>P. multocida</i> , <i>M. ovis</i>                                                                                                        |
| 35  | D    | -               | -               | 35,07            | 33,39           | -                | <i>S. sciuri</i>                                                                                                                            |
| 36  | D    | -               | -               | 27,62            | 20,61           | -                | <i>M. ovis</i> , <i>Staphylococcus haemolyticus</i>                                                                                         |
| 37  | D    | -               | -               | 29,33            | 26,39           | -                | <i>G. anatis</i> , <i>S. suis</i>                                                                                                           |
| 38  | D    | -               | -               | 28,47            | 28,38           | -                | <i>M. ovis</i> , <i>Staphylococcus spp.</i>                                                                                                 |
| 39  | D    | -               | -               | 22,28            | 21,95           | -                | <i>M. ovis</i> , <i>Staphylococcus chromogenes</i>                                                                                          |
| 40  | E    | 2,33            | -               | 34,44            | 32,70           | -                | <i>E. coli</i>                                                                                                                              |
| 41  | E    | -               | 32,24           | 38,18            | 27,26           | -                | <i>Morganella morgani</i> , <i>Lysinibacillus fusiformis</i>                                                                                |
| 42  | E    | 2,42            | -               | 30,23            | 28,94           | -                | <i>L. fusiformis</i> , <i>Providencia rettgeri</i>                                                                                          |
| 43  | E    | -               | 39,55           | -                | 29,61           | -                | -                                                                                                                                           |
| 44  | E    | 2,24            | 27,71           | 29,22            | 28,58           | +                | <i>M. haemolytica</i> , <i>E. coli</i>                                                                                                      |
| 45  | E    | 2,41            | 31,53           | 36,07            | 36,08           | +                | <i>Pantoea agglomerans</i> , <i>Staphylococcus felurettii</i> , <i>B. subtilis</i>                                                          |
| 46  | E    | 1,96            | 36,51           | 31,85            | 23,17           | +                | <i>H. somni</i>                                                                                                                             |
| 47  | E    | 2,41            | 31,80           | 27,15            | 26,06           | +                | <i>M. haemolytica</i> , <i>H. somni</i> , <i>S. suis</i>                                                                                    |
| 48  | E    | 2,36            | 36,13           | 28,31            | 24,71           | -                | <i>M. haemolytica</i>                                                                                                                       |
| 49  | E    | 2,11            | 32,39           | 27,29            | 21,50           | +                | <i>P. multocida</i> , <i>B. pumilus</i> , <i>Streptococcus dysgalactiae</i>                                                                 |
| 50  | E    | 2,46            | 38,98           | 38,46            | 31,94           | -                | -                                                                                                                                           |

| No. | Farm | ID<br><i>Mb</i> | Ct<br><i>Mb</i> | Ct<br><i>Mbr</i> | Ct<br><i>Md</i> | Tween-80<br><i>Mb</i> | Blood agar (24 hours)<br>Identification with MALDI-TOF                                                                 |
|-----|------|-----------------|-----------------|------------------|-----------------|-----------------------|------------------------------------------------------------------------------------------------------------------------|
| 51  | F    | -               | -               | -                | 23,54           | -                     | <i>M. haemolytica</i> , <i>S. suis</i>                                                                                 |
| 52  | F    | -               | -               | -                | 37,32           | -                     | -                                                                                                                      |
| 53  | F    | -               | -               | 29,89            | 30,13           | -                     | <i>Mannheimia varigena</i> , <i>bacillus licheniformis</i> , <i>B. pumilus</i> ,<br><i>Streptococcus pluranimalium</i> |
| 54  | F    | -               | -               | 31,47            | 30,11           | -                     | <i>B.licheniformis</i> , <i>B. pumilus</i> , <i>S. pluranimalium</i> , <i>E. coli</i>                                  |
| 55  | F    | -               | -               | 35,47            | 28,30           | -                     | <i>B. trehalosi</i> , <i>B. pumilus</i>                                                                                |
| 56  | F    | -               | -               | 34,53            | 38,17           | -                     | <i>B. licheniformis</i> , <i>B. pumilus</i> , <i>S. pluranimalium</i> , <i>S. chromogenes</i>                          |
| 57  | G    | -               | -               | 36,06            | -               | -                     | -                                                                                                                      |
| 58  | H    | -               | -               | 25,58            | 23,06           | -                     | <i>Moraxella bovoculi</i>                                                                                              |
| 59  | H    | -               | -               | 26,31            | 21,07           | -                     | <i>P. multocida</i> , <i>M. bovoculi</i>                                                                               |
| 60  | H    | -               | -               | 28,55            | 27,10           | -                     | <i>M. bovoculi</i> , <i>Streptococcus spp.</i> <i>Trueperella pyogenes</i>                                             |
| 61  | H    | -               | -               | 26,71            | 24,68           | -                     | <i>P. multocida</i> , <i>M. bovoculi</i> <i>S. suis</i>                                                                |
| 62  | H    | -               | -               | 27,21            | 21,85           | -                     | <i>P. multocida</i> , <i>M. ovis</i> , <i>Streptococcus</i>                                                            |
| 63  | H    | -               | -               | 37,00            | 27,10           | -                     | <i>S. equorum</i>                                                                                                      |
| 64  | H    | -               | -               | 31,03            | 23,80           | -                     | <i>Moraxella spp.</i> , <i>Streptococcus spp.</i>                                                                      |
| 65  | H    | -               | -               | 31,53            | 23,31           | -                     | <i>M. ovis</i> , <i>Neisseria meningitidis</i>                                                                         |
| 66  | H    | -               | -               | -                | 28,72           | -                     | -                                                                                                                      |
| 67  | H    | -               | -               | -                | 27,32           | -                     | <i>Acinetobacter wolfii</i>                                                                                            |
| 68  | I    | 2,65            | 27,93           | 29,52            | 28,82           | +                     | -                                                                                                                      |
| 69  | I    | -               | 32,42           | 25,72            | 24,63           | +                     | <i>M. haemolytica</i> , <i>B. licheniformis</i>                                                                        |
| 70  | I    | 2,26            | 33,65           | 29,13            | 22,80           | +                     | <i>M. haemolytica</i>                                                                                                  |
| 71  | I    | -               | 28,14           | 27,04            | 23,10           | +                     | <i>M. haemolytica</i> , <i>Neisseria spp.</i>                                                                          |
| 72  | I    | 2,16            | 31,65           | 28,00            | 22,75           | +                     | <i>M. haemolytica</i>                                                                                                  |
| 73  | I    | 2,08            | 40,87           | 36,66            | 24,30           | -                     | -                                                                                                                      |
| 74  | I    | 2,35            | 34,14           | 28,79            | 22,47           | -                     | <i>M. haemolytica</i>                                                                                                  |
| 75  | I    | -               | 31,28           | 25,69            | 21,06           | +                     | <i>M. haemolytica</i> , <i>P. multocida</i> , <i>Streptococcus spp.</i>                                                |
| 76  | I    | 1,93            | 30,51           | 27,18            | 20,81           | +                     | <i>M. haemolytica</i> , <i>Stenotrophomonas spp.</i> , <i>Bacillus spp.</i>                                            |
| 77  | I    | 2,06            | 40,13           | 29,82            | 24,29           | -                     | <i>M. haemolytica</i>                                                                                                  |
| 78  | I    | 2,44            | 34,91           | 32,04            | 25,57           | -                     | <i>P. multocida</i>                                                                                                    |
| 79  | I    | 2,28            | 29,90           | 28,96            | 25,38           | +                     | <i>M. haemolytica</i>                                                                                                  |
| 80  | I    | 1,93            | -               | 27,91            | 23,65           | -                     | <i>P. multocida</i>                                                                                                    |
| 81  | I    | 2,04            | 31,83           | 27,29            | 23,41           | +                     | <i>M. haemolytica</i> , <i>P. multocida</i>                                                                            |
| 82  | I    | 2,29            | 30,81           | 29,32            | 26,20           | +                     | <i>P. multocida</i>                                                                                                    |
| 83  | I    | 2,48            | 23,29           | 28,19            | 25,99           | +                     | <i>P. multocida</i>                                                                                                    |
| 84  | I    | -               | -               | 39,01            | 28,54           | -                     | <i>P. multocida</i>                                                                                                    |
| 85  | J    | 1,92            | 38,87           | 25,54            | 22,48           | -                     | <i>M. haemolytica</i> , <i>S. suis</i>                                                                                 |
| 86  | J    | -               | -               | 32,45            | 23,39           | -                     | <i>M. haemolytica</i>                                                                                                  |
| 87  | J    | -               | -               | 38,95            | 35,40           | -                     | -                                                                                                                      |
| 88  | J    | -               | 35,92           | -                | 32,20           | -                     | <i>M. varigena</i>                                                                                                     |
| 89  | J    | 2,01            | 34,15           | 26,03            | 25,00           | +                     | <i>M. haemolytica</i> , <i>Staphylococcus cohnii</i> , <i>E. coli</i> , <i>S. suis</i> ,<br><i>Streptococcus ferus</i> |
| 90  | J    | -               | 37,67           | -                | 41,68           | -                     | -                                                                                                                      |
| 91  | J    | 1,84            | 38,30           | 28,92            | 23,03           | -                     | <i>P. multocida</i> , <i>Staphylococcus saprophyticus</i>                                                              |
| 92  | J    | 2,05            | 40,24           | 27,68            | 26,31           | -                     | <i>B. trehalosi</i>                                                                                                    |
| 93  | J    | 2,2             | 34,39           | 29,04            | 23,81           | -                     | <i>M. haemolytica</i> , <i>T. pyogenes</i>                                                                             |
| 94  | J    | 1,96            | 28,00           | 24,61            | 26,42           | +                     | <i>M. haemolytica</i> , <i>Serratia rubidaea</i> , <i>Citrobacter amalonaticus</i>                                     |
| 95  | J    | 2,24            | 31,56           | 24,71            | 27,02           | +                     | <i>S. chromogenes</i>                                                                                                  |
| 96  | J    | 1,89            | 31,52           | 27,73            | 22,01           | +                     | -                                                                                                                      |
| 97  | J    | -               | -               | 28,73            | 23,09           | -                     | -                                                                                                                      |
| 98  | J    | -               | 34,76           | 33,59            | 31,76           | -                     | <i>M. haemolytica</i> , <i>P. multocida</i>                                                                            |
| 99  | J    | -               | 41,34           | 26,02            | 23,16           | +                     | <i>M. haemolytica</i>                                                                                                  |
| 100 | J    | -               | -               | 28,55            | 21,59           | +                     | -                                                                                                                      |
| 101 | J    | 2,51            | -               | 35,07            | 31,20           | -                     | <i>M. haemolytica</i> , <i>E. coli</i>                                                                                 |
| 102 | J    | 1,92            | 35,03           | 27,88            | 27,25           | -                     | <i>Staphylococcus haemolyticus</i>                                                                                     |
| 103 | J    | -               | 39,30           | 34,68            | 30,39           | -                     | <i>P. multocida</i>                                                                                                    |
| 104 | J    | 1,84            | 31,61           | 24,81            | 22,02           | +                     | <i>M. haemolytica</i> , <i>Moraxella branhamella ovis</i>                                                              |

\* = result based on ID after 48h of incubation; Ct values were interpreted as positive (< 35), doubtful (35-40) or negative (>40)(Wisselink et al., 2019).
